# Supplementary material for: Alterations in Faecal and Serum Metabolic Profiles in Patients with Neovascular Age-Related Macular Degeneration
Source: Nutrients. 2023 Jun 30;15(13):2984. doi: 10.3390/nu15132984 (PMC10346323; doi:10.3390/nu15132984)

## Supporting Information

### Supplementary Tables

**Supplementary Table S1.** ROC analysis on the differential fecal metabolites of AMD detected in positive and negative ion mode.

**Supplementary Table S2.** ROC analysis on the differential serum metabolites detected in positive and negative ion mode.

### Supplementary Figures

**Supplementary Figure S1.** Permutation test of the PLS-DA model in the (A) positive and (B) negative ion modes based on the fecal metabolomics data of the study cohort. The R<sup>2</sup>Y value represents the goodness of fit of the model. The Q<sup>2</sup> value represents the predictability of the models. All R<sup>2</sup>Y and Q<sup>2</sup> values to the left were lower than the original points to the right of the blue regression line of the Q<sup>2</sup> points, which intersects the vertical axis (on the left) at or below zero, showing that the PLS-DA model was valid. Permutation test plot for the PLS-DA model (number of permutations, 200; intercepts R<sup>2</sup>=0.0, 0.708, Q<sup>2</sup>=0.0, -0.209 in ESI+; R<sup>2</sup>=0.0, 0.677, Q<sup>2</sup>=0.0, -0.15 in ESI-). ESI, electrospray ionization; PLS-DA, partial least squares-discriminant analysis.

**Supplementary Figure S2.** Permutation test of the PLS-DA model in the (A) positive and (B) negative ion modes based on the serum metabolomics data of the study cohort. The R<sup>2</sup>Y value represents the goodness of fit of the model. The Q<sup>2</sup> value represents the predictability of the models. All R<sup>2</sup>Y and Q<sup>2</sup> values to the left were lower than the original points to the right of the blue regression line of the Q<sup>2</sup> points, which intersects the vertical axis (on the left) at or below zero, showing that the PLS-DA model was valid. Permutation test plot for the PLS-DA model (number of permutations, 200; intercepts R<sup>2</sup>=0.0, 0.64, Q<sup>2</sup>=0.0, -0.159 in ESI+; R<sup>2</sup>=0.0, 0.829, Q<sup>2</sup>=0.0, -0.162 in ESI-). ESI, electrospray ionization; PLS-DA, partial least squares-discriminant analysis.

## Supplementary Tables

**Supplementary Table S1.** ROC analysis on the differential fecal metabolites of AMD detected in positive and negative ion mode calculated.

| Ion mode          | Metabolites                            | AUC   | SE    | p-value | 95% CI      |
|-------------------|----------------------------------------|-------|-------|---------|-------------|
| Positive ion mode | Palmitoyl ethanolamide                 | 0.838 | 0.072 | 0.001   | 0.697-0.979 |
|                   | Stearoyl ethanolamide                  | 0.79  | 0.078 | 0.004   | 0.638-0.943 |
|                   | Sphingosine                            | 0.765 | 0.09  | 0.009   | 0.588-0.941 |
|                   | Oleoyl ethanolamide                    | 0.746 | 0.085 | 0.016   | 0.579-0.913 |
|                   | N-Acetylputrescine                     | 0.735 | 0.088 | 0.021   | 0.564-0.907 |
|                   | 2-(14,15-Epoxyeicosatrienoyl) glycerol | 0.482 | 0.103 | 0.857   | 0.28-0.683  |
|                   | 5-Hydroxyindoleacetic acid             | 0.415 | 0.102 | 0.407   | 0.216-0.615 |
|                   | N6,N6,N6-Trimethyl-L-lysine            | 0.375 | 0.101 | 0.221   | 0.177-0.573 |
|                   | Creatinine                             | 0.467 | 0.104 | 0.746   | 0.264-0.67  |
|                   | Benzamide                              | 0.463 | 0.103 | 0.719   | 0.262-0.664 |
|                   | Dimethylbenzimidazole                  | 0.456 | 0.103 | 0.666   | 0.255-0.657 |
|                   | Uridine                                | 0.768 | 0.082 | 0.009   | 0.608-0.929 |
|                   | Nicotinic acid                         | 0.761 | 0.086 | 0.011   | 0.593-0.929 |
|                   | p-Anisic acid                          | 0.741 | 0.086 | 0.019   | 0.572-0.91  |
| Negative ion mode | D-Xylose                               | 0.746 | 0.085 | 0.016   | 0.579-0.914 |
|                   | Glyceric acid                          | 0.746 | 0.088 | 0.016   | 0.574-0.918 |
|                   | 2-Methylbenzoic acid                   | 0.305 | 0.091 | 0.056   | 0.126-0.484 |
|                   | Chenodeoxycholic Acid                  | 0.316 | 0.096 | 0.072   | 0.129-0.503 |

Notes: AMD, age-related macular degeneration; ROC, receiver operating characteristic; AUC, area under the curve; CI, confidence interval;

**Supplementary Table S2.** ROC on the differential serum metabolites detected in positive and negative ion mode.

| Ion mode          | Metabolites                            | AUC   | SE    | p-value | 95% CI        |
|-------------------|----------------------------------------|-------|-------|---------|---------------|
| Positive ion mode | 4-Hydroxybenzoic acid                  | 0.819 | 0.082 | 0.003   | 0.658 - 0.98  |
|                   | 1-Methylhistidine                      | 0.762 | 0.092 | 0.016   | 0.581 - 0.942 |
|                   | Creatine                               | 0.743 | 0.096 | 0.026   | 0.555 – 0.93  |
|                   | Inosine                                | 0.724 | 0.096 | 0.04    | 0.536 – 0.911 |
|                   | Caffeine                               | 0.724 | 0.095 | 0.04    | 0.538-0.910   |
|                   | Hypoxanthine                           | 0.719 | 0.099 | 0.045   | 0.526 – 0.912 |
|                   | DL-Acetylcarnitine                     | 0.71  | 0.11  | 0.055   | 0.493 – 0.926 |
|                   | 1-Monolinolein                         | 0.319 | 0.109 | 0.097   | 0.106 – 0.532 |
|                   | Adrenic acid                           | 0.981 | 0.02  | <0.0001 | 0.943-1.0     |
|                   | Palmitic acid                          | 0.938 | 0.06  | <0.0001 | 0.82-1.0      |
|                   | Arachidic acid                         | 0.838 | 0.079 | 0.002   | 0.683-0.993   |
|                   | 2-Hydroxymyristic acid                 | 0.757 | 0.095 | 0.018   | 0.571- 0.943  |
|                   | 1,3,7-Trimethyluric acid               | 0.748 | 0.096 | 0.023   | 0.56-0.936    |
|                   | D-(+)-Glucose                          | 0.738 | 0.101 | 0.029   | 0.541-0.935   |
|                   | Lactic Acid                            | 0.69  | 0.103 | 0.081   | 0.489-0.892   |
| Negative ion mode | 5alpha-Dihydrotestosterone glucuronide | 0.686 | 0.103 | 0.089   | 0.483-0.888   |
|                   | 1-Methylxanthine                       | 0.667 | 0.104 | 0.127   | 0.464-0.87    |
|                   | 3-Methylglutaric acid                  | 0.605 | 0.107 | 0.337   | 0.396-0.814   |
|                   | 2-Deoxyribose 5-phosphate              | 0.581 | 0.109 | 0.458   | 0.368-0.794   |
|                   | Prolylglycine                          | 0.581 | 0.109 | 0.458   | 0.368-0.792   |
|                   | Ornithine                              | 0.51  | 0.113 | 0.93    | 0.287-0.7732  |
|                   | Citric acid                            | 0.481 | 0.113 | 0.861   | 0.259-0.703   |
|                   | Nervonic acid                          | 0.486 | 0.112 | 0.896   | 0.266-0.705   |
|                   | D-(+)-Tryptophan                       | 0.419 | 0.109 | 0.458   | 0.205-0.633   |
|                   | Uric acid                              | 0.39  | 0.107 | 0.315   | 0.181-0.6     |
|                   | Xanthine                               | 0.352 | 0.112 | 0.176   | 0.133-0.572   |
|                   | L-Histidine                            | 0.343 | 0.107 | 0.15    | 0.134-0.552   |
|                   | L-Tyrosine                             | 0.319 | 0.102 | 0.097   | 0.120.518     |

Notes: AMD, age-related macular degeneration; ROC, receiver operating characteristic; SVM, support vector machine; AUC, area under the curve; CI, confidence interval.

## Supplementary Figures

**Supplementary Figure S1.** Permutation test of the PLS-DA model in the (A) positive and (B) negative ion modes based on the fecal metabolomics data of the study cohort. The R<sup>2</sup>Y value represents the goodness of fit of the model. The Q<sup>2</sup> value represents the predictability of the models. All R<sup>2</sup>Y and Q<sup>2</sup> values to the left were lower than the original points to the right of the blue regression line of the Q<sup>2</sup> points, which intersects the vertical axis (on the left) at or below zero, showing that the PLS-DA model was valid. Permutation test plot for the PLS-DA model (number of permutations, 200; intercepts R<sup>2</sup>=0.0, 0.708, Q<sup>2</sup>=0.0, -0.209 in ESI+; R<sup>2</sup>=0.0, 0.677, Q<sup>2</sup>=0.0, -0.15 in ESI-). ESI, electrospray ionization; PLS-DA, partial least squares-discriminant analysis.

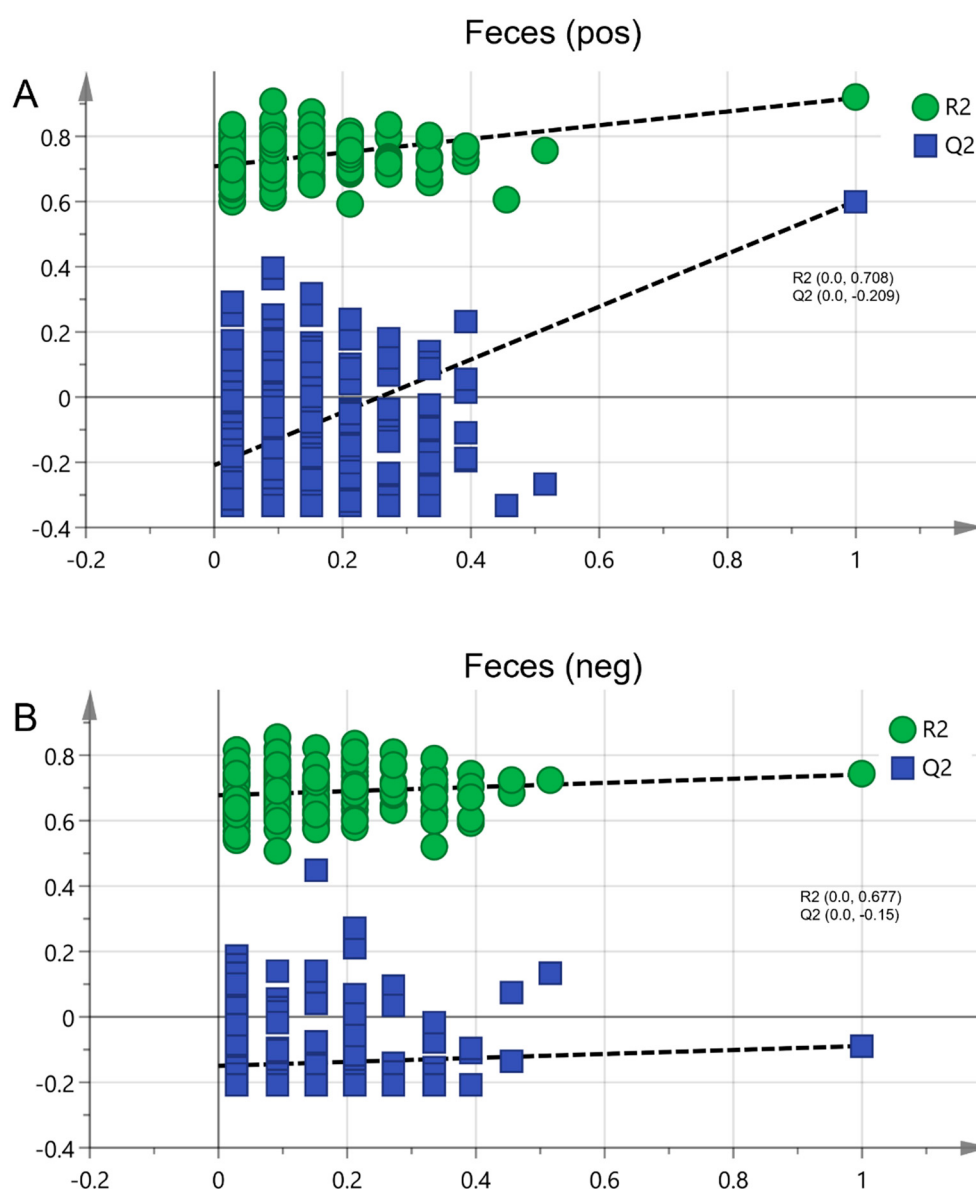

**Supplementary Figure S2.** Permutation test of the PLS-DA model in the (A) positive and (B) negative ion modes based on the serum metabolomics data of the study cohort. The R<sup>2</sup>Y value represents the goodness of fit of the model. The Q<sup>2</sup> value represents the predictability of the models. All R<sup>2</sup>Y and Q<sup>2</sup> values to the left were lower than the original points to the right of the blue regression line of the Q<sup>2</sup> points, which intersects the vertical axis (on the left) at or below zero, showing that the PLS-DA model was valid. Permutation test plot for the PLS-DA model (number of permutations, 200; intercepts R<sup>2</sup>=0.0, 0.64, Q<sup>2</sup>=0.0, -0.159 in ESI+; R<sup>2</sup>=0.0, 0.829, Q<sup>2</sup>=0.0, -0.162 in ESI-). ESI, electrospray ionization; PLS-DA, partial least squares-discriminant analysis.

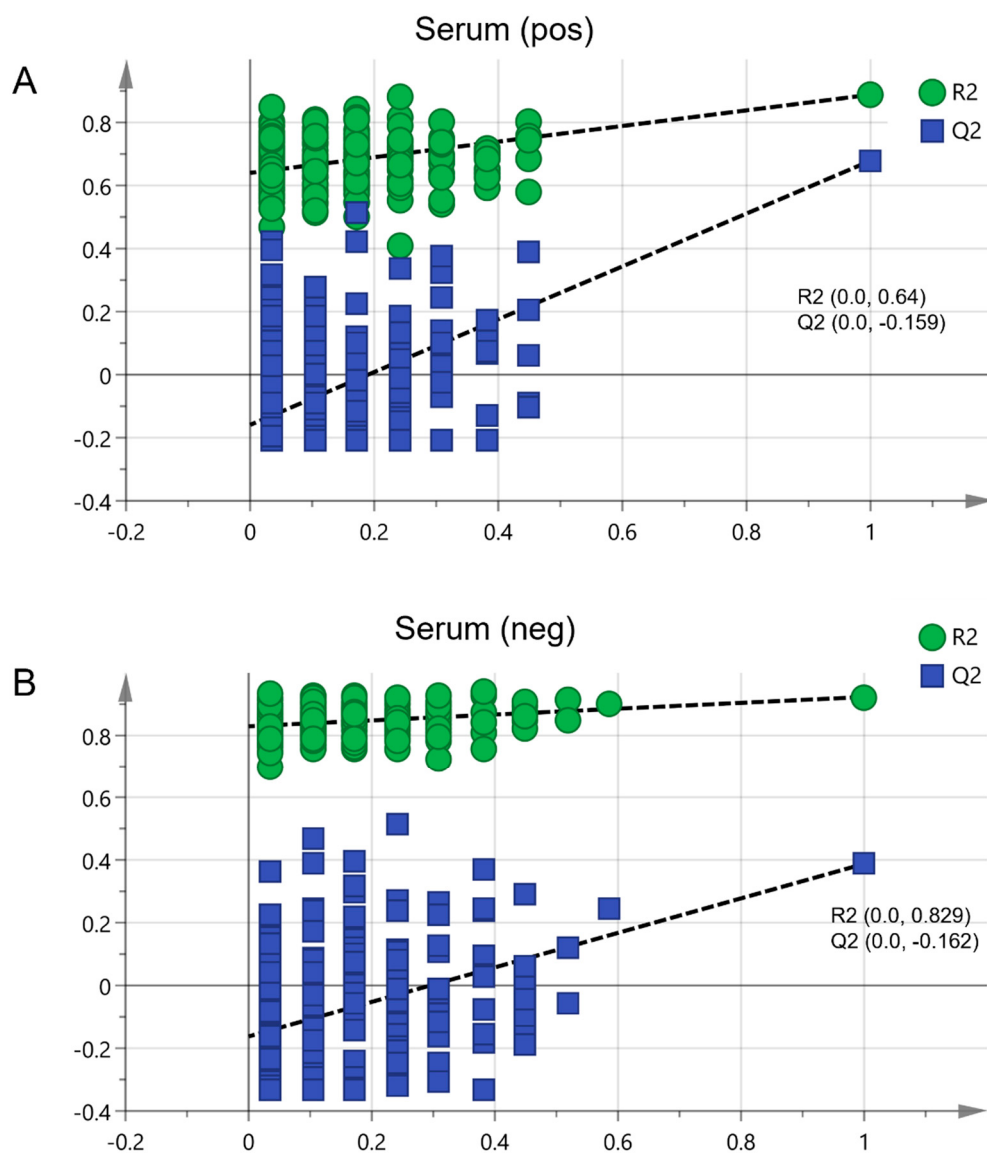

Supplement: Supplementary file 1 [file nutrients-15-02984-s001.zip › Supporting Information-submitted.pdf]
