# Supplementary material for: Alterations in Faecal and Serum Metabolic Profiles in Patients with Neovascular Age-Related Macular Degeneration
Source: Nutrients. 2023 Jun 30;15(13):2984. doi: 10.3390/nu15132984 (PMC10346323; doi:10.3390/nu15132984)
Supplement: Supplementary file 1 [file nutrients-15-02984-s001.zip]

Archive with 4 entries (4 files):
- Figure S1.png
- Figure S2.png
- Supporting Information-submitted.pdf
- Table S1&S2.pptx
